1    **Application of subject-specific adaptive mechanical loading for bone**  
2    **healing in a mouse tail vertebral defect.**

3

4

5    Angad Malhotra<sup>1</sup>, Matthias Walle<sup>1</sup>, Graeme R. Paul<sup>1</sup>, Gisela A. Kuhn<sup>1</sup>, Ralph Müller<sup>1\*</sup>.

6    <sup>1</sup>Institute for Biomechanics, ETH Zurich, Zurich, Switzerland.

7

8

9

10    **\*Corresponding author:**

11    Ralph Müller, PhD

12    Institute for Biomechanics

13    ETH Zurich

14    Leopold-Ruzicka-Weg 4

15    8093 Zurich, Switzerland

16    Email: ram@ethz.ch

## 17 **Abstract**

18 Methods to repair bone defects arising from trauma, resection, or disease, continue to be sought after.  
19 Cyclic mechanical loading is well established to influence bone (re)modelling activity, in which bone  
20 formation and resorption are correlated to micro-scale strain. Based on this, the application of  
21 mechanical stimulation across a bone defect could improve healing. However, if ignoring the  
22 mechanical integrity of defected bone, loading regimes have a high potential to either cause damage or  
23 be ineffective. This study explores real-time finite element (rtFE) methods that use three-dimensional  
24 structural analyses from micro-computed tomography images to estimate effective peak cyclic loads in  
25 a subject-specific and time-dependent manner. It demonstrates the concept in a cyclically loaded  
26 mouse caudal vertebral bone defect model. Using rtFE analysis combined with adaptive mechanical  
27 loading, mouse bone healing was significantly improved over non-loaded controls, with no incidence  
28 of vertebral fractures. Such rtFE-driven adaptive loading regimes demonstrated here could be relevant  
29 to clinical bone defect healing scenarios, where mechanical loading can become patient-specific and  
30 more efficacious. This is achieved by accounting for initial bone defect conditions and spatio-temporal  
31 healing, both being factors that are always unique to the patient.

## 32 **Introduction**

33 The management of critical-size bone defects continues to present surgical challenges. Trauma and  
34 bone resection can lead to lengthy recovery times or amputation. The use of autografts is the current  
35 gold standard, however, is quantity-limited and accounts for 20% of the complications<sup>1</sup>. Despite  
36 advances in biomaterial development and understanding of signaling mechanisms, the search for  
37 improved treatment methods of such bone defects continues.

38

39 One treatment method of interest is mechanical loading of bone. Mechanical interactions have a long-  
40 established relationship to bone physiology, leading to earlier concepts of micromotion during bone  
41 defect healing<sup>2</sup>, and the significance of fracture instability in healing outcomes<sup>3,4</sup>. The effects of  
42 mechanical forces on bone healing have been previously reviewed<sup>5,6</sup>; mechanical loading is likely to  
43 depend on frequency<sup>7</sup> and cycle number<sup>8</sup>, influences mesenchymal stem cell differentiation<sup>9</sup>, and has a  
44 role in guiding healing towards primary and secondary bone healing pathways<sup>10</sup>. In contrast,  
45 mechanical loading and relative motion of fragments showed little to no benefit in other studies<sup>11,12</sup>,  
46 though the timing of the changes of the mechanical environment in relation to healing phases could  
47 also play a role<sup>13</sup>. This further highlights the need to understand the mechanical environment in and  
48 around bone defects during healing. This mechanical environment of bone includes the relevant  
49 surrounding hard and soft tissues, and their interaction as subject to Newtonian mechanics, which  
50 allows computational exploitation for assessing the loading history and relationship to morphological  
51 changes<sup>14</sup>. However, the translation of these load-driven bone (re)modelling concepts to highly unique  
52 bone defect healing scenarios is lacking. Another current challenge that arises is how to determine the  
53 force that needs to be applied in a subject-specific manner in order to have a maximal  
54 mechanobiological cue without damaging the bone.

55

56 Finite element (FE) analysis is a well-proven approach to understand micro-scale strains and has been  
57 previously successfully used to correlate strain and in vivo bone (re)modelling activities in mice<sup>15-17</sup>.  
58 In such workflows, bone mechanoregulation can be studied non-invasively by combining imaging and

59 computational FE-derived strain estimation methods<sup>18</sup>. With advances in computational power, the  
60 time needed to calculate voxel-based strains relevant for bone healing has drastically shortened in the  
61 last decade. Depending on the complexity and resolution deemed suitable, it is possible to do this  
62 immediately after imaging to limit unnecessary or additional handling and anesthesia in mice. This  
63 concept is concurrently presented in a mouse femoral defect model<sup>19,20</sup>, and in combination introduce  
64 the concept of real-time finite element (rtFE) analysis to describe this approach. Since mechanical  
65 loading is effective only within a certain strain window<sup>21</sup>, maintaining the applied loading within this  
66 window is critical. Loading too high risks damage (Supplementary Fig. S1a) and loading too low risks  
67 no effect. FE analysis can be used to estimate the optimal forces, and the rtFE method builds on this  
68 by streamlining the process of imaging, analysis, and treatment.

69

70 Two factors are relevant for determination of the appropriate loading conditions: the defect itself; and  
71 its changes due to healing. First, every defect is unique in shape, size, and location. This, in  
72 combination with the surrounding structural anatomy, will influence how strain is transferred across  
73 the region. Second, inherent differences between an individual's healing capabilities will always exist.  
74 When bone heals, the tissue-level stiffness increases. If constant stimuli are applied, micro-level  
75 strains will decrease as bone forms and reinforces the defect. This would lead to a lowering of the  
76 regional strain, and result in sub-optimal loading conditions. Therefore, applying individualized and  
77 adapting loading regimes that factor in the defect and its unique healing has high potential to promote  
78 bone healing, not only in mice, but in humans, where these two factors can vary widely case to case.

79

80 Applying loads to a bone defect, and imaging it at the necessary resolution, are fundamental  
81 requirements of this study. A previously described method enabled the loading of mouse vertebrae<sup>22-</sup>  
82 <sup>24</sup>, and importantly, allowed high-resolution scanning of the vertebrae. This was recently advanced on  
83 to investigate the loading frequency effect on mouse vertebral bone parameters<sup>25</sup>. To investigate  
84 specifically bone defect healing in this current study, a caudal vertebral bone defect model was  
85 developed, which could be incorporated into the previously successfully used workflows. This model

86 is straightforward, reproducible and facilitates biomaterial placement<sup>26</sup>. In comparison to commonly  
87 used mouse hind leg models, the vertebral model can reduce the complexity and uncertainty within the  
88 FE simulation. For example, hind leg models can have more complex boundary conditions due to  
89 more complex joint constraints of the limb, greater influence from external bodyweight loadings due  
90 to gravity, and higher internal muscle-bone loads applied by the mouse during ambulation<sup>27</sup>.  
91 Furthermore, the vertebral model requires no surgical fixation, and allows for early loading post-  
92 surgery due to the high initial stability of the defect region compared to osteotomy-based models. This  
93 lack or presence of fixation can make comparisons difficult, even if one considers that the  
94 mechanobiological responses are consistent. Overall, the vertebral defect model introduced here  
95 provides another anatomical location to advance theories of bone mechanoregulation during defect  
96 healing.

97

98 Longitudinal time-lapsed imaging with micro-computed tomography (micro-CT) is a suitable method  
99 to image bone at the early stages of healing<sup>28</sup>. This can provide short time interval snapshots of the  
100 healing progression and create high-resolution datasets for FE simulations. This time-lapsed imaging  
101 method is currently most feasible in smaller animals, and has been previously demonstrated in  
102 vertebrae<sup>22</sup>, and recently within both mouse femoral defect models<sup>29</sup>, and to assess longer-term  
103 morphological changes of intact mouse vertebrae<sup>25,30</sup>. This method is highly relevant here to provide  
104 weekly insights into the subject-specific healing progression, and when used in combination with the  
105 rtFE methods, it enables in vivo assessment and proportional changes to the loading conditions  
106 simultaneously.

107

108 The objective of this study was to test the feasibility and effect of subject-specific adaptive mechanical  
109 loading to treat bone defects. This was investigated in a newly developed mouse vertebral defect  
110 model that allowed mechanical loading across the vertebrae, as well as high-resolution imaging for  
111 rtFE analyses. As humans also share similarities to bone loading responses<sup>31</sup>, such a workflow could

112 pave the way for patient-specific loading regimes that increase the effect and repeatability of  
113 mechanical loading regimes for bone regeneration strategies.

114

## 115 **Results**

### 116 **General observations**

117 All mice tolerated the defect surgery procedure well, with no impaired movement or indications of  
118 pain, except one, which was euthanized out of precaution immediately after surgery due to perceived  
119 excessive bleeding during surgery. None of the remaining mice experienced adverse effects from the  
120 rtFE procedure, with no fractures or additional pain due to the workflow. One additional mouse was  
121 euthanized after one week due to increasing and persistent swelling and signs of osteolysis in the  
122 adjacent vertebrae around the pins. Furthermore, one defect was excluded from the data analysis  
123 because it was drilled through two cortices. In total, this resulted in groups of 6 (control) and 7 (rtFE  
124 loading) mice.

125

126 The rtFE method implemented in the study increased the total anesthesia time from approximately 22  
127 minutes for the classic procedure to approximately 30 minutes. This additional time was due to the  
128 computing time and adjustment of the loading device, and is a downside of the rtFE method  
129 (Supplementary Fig. S3). No difference in the time to regain consciousness was noted, and all mice  
130 recovered from the anesthesia as expected. Force increased significantly over time ( $F(3,18)=25.8$ ,  
131  $p<0.001$ ), with the initial average peak-to-peak force of the cyclic load calculated for the rtFE loading  
132 groups was 4.3N ( $\pm 0.7$ ), and significantly increased per week, first to 4.5 N ( $\pm 0.5$ ), then to 4.8 N  
133 ( $\pm 0.4$ ), and to 5.2N ( $\pm 0.3$ ) in the final week of loading.

134

135 Healing progressed appositionally from the ventral and lateral internal surfaces of the bone (Fig. 1a).

136 There were no signs of cortical bridging. Dense trabecular bone formed in regions where it would

137 bridge to adjacent surfaces (Fig. 1b), stabilizing the defect against the applied loading and consequent  
138 bending moment induced by the defect asymmetry.

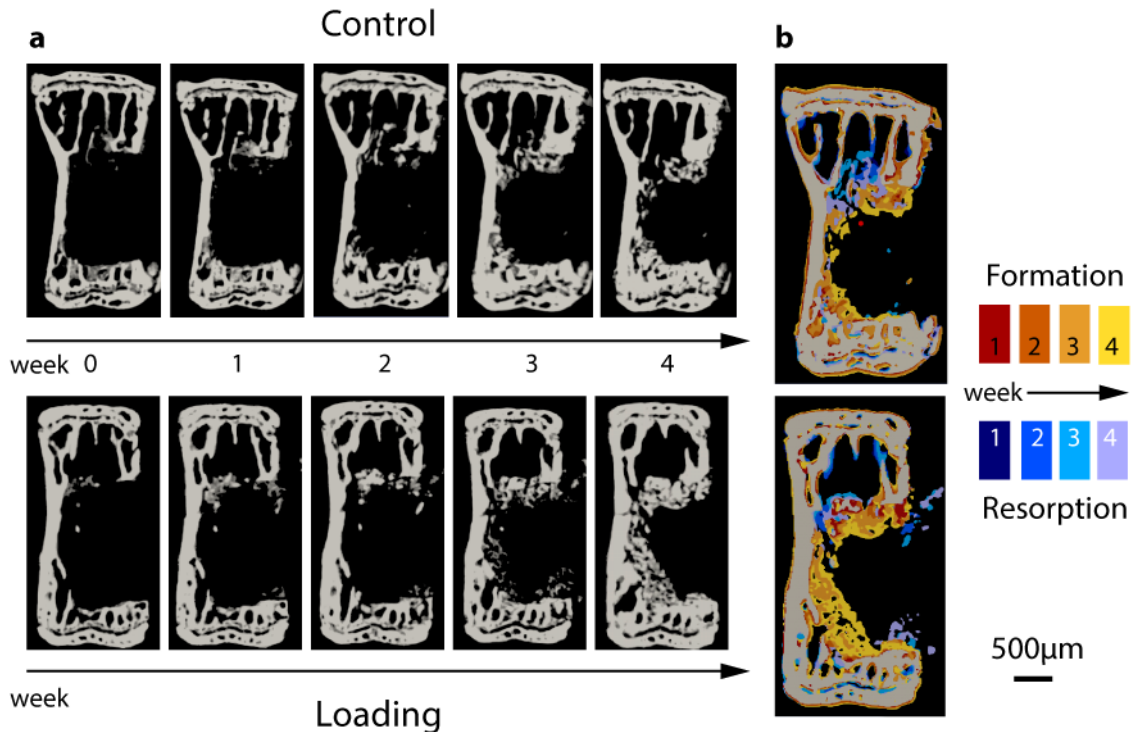

139  
140 **Figure 1. Time lapsed imaging and overlay of formation and resorption on a weekly basis. (a)**  
141 Time lapsed images of representative animals from both groups. **(b)** Weekly overlays show formation  
142 and resorption patterns from 1 to 4 weeks post-surgery. Bone formed within the defect without cortical  
143 bridging. Red/yellow: bone volume formed at week 1, 2, 3, and 4. Blue/purple: bone volume resorbed  
144 at week 1, 2, 3, and 4.

145

## 146 Longitudinal assessment of bone defect healing

147 Two volumes were created to differentiate between the initial empty defect space, and the existing  
148 surrounding bone. These were the defect centre (DC) and the defect periphery (DP). (Fig. 2a). Within  
149 DC (Fig. 2b), a significant interaction was present for bone volume fraction (BV/TV) between time  
150 and loading ( $F(1,4)=8.90, p<0.005$ ). At week 2, 3 and 4, loading significantly increased BV/TV over  
151 controls ( $p<0.05$ ). BV/TV increased significantly over time in both loading and control groups  
152 ( $p<0.005$ ). In the DP, both time ( $F(1,4)=164.7, p<0.005$ ) and the loading ( $F(1,4)=5.34, p=0.041$ ) had  
153 significant overall effects on BV/TV (Fig. 2c).

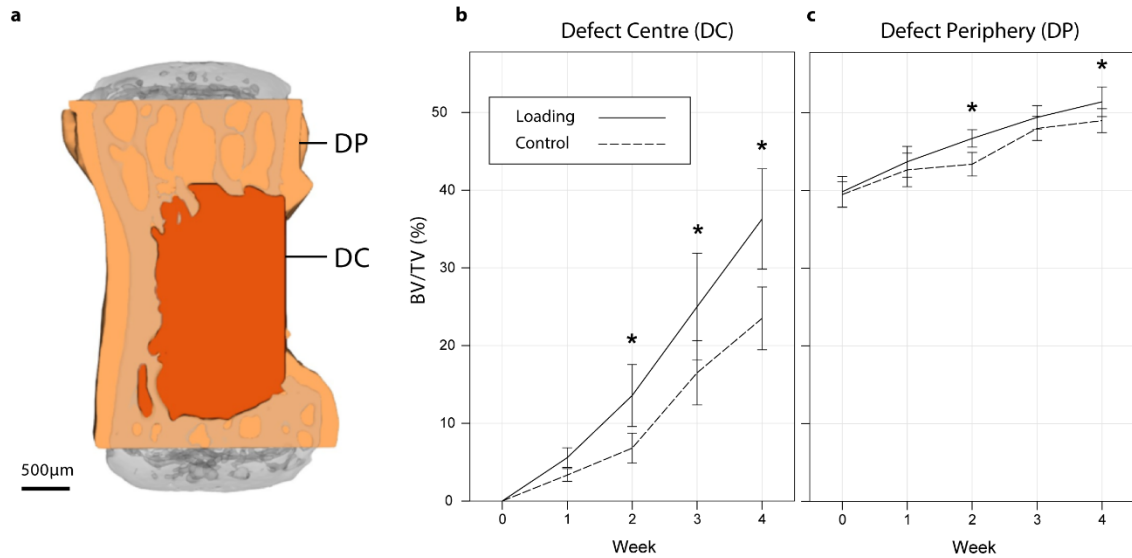

154

155 **Figure 2. Longitudinal changes in bone volume fraction. (a)** The vertebrae were divided into a  
 156 defect centre (DC) and defect periphery (DP). **(b)** BV/TV within the DC significantly increased with  
 157 the rtFE loading from week 2 compared to controls. **(c)** BV/TV within DP was also found to be  
 158 influenced, but not to the same magnitude or extent as the DC.

159

160 Overall, loading ( $F(1,3)=12.6$ ,  $p<0.001$ ) and time ( $F(1,3)=23.2$ ,  $p<0.001$ ) had a significant effect on  
 161 the DC bone formation rate (BFR/DC). Loading significantly increased BFR/DC over controls  
 162 between weeks 1-2 ( $F(1,3)=5.83$ ,  $p=0.013$ ), and weeks 3-4 ( $F(1,3)=4.39$ ,  $p=0.042$ ), though did not  
 163 reach significance for weeks 2-3 ( $F(1,3)=2.05$ ,  $p=0.159$ ) (Fig. 3a). Loading did not largely affect the  
 164 DP bone formation rate (BFR/DP) or DP bone resorption rate (BRR/DP) at any time (Fig. 3b). Also,  
 165 overall, loading did not have a large effect on BRR/DC or BRR/DP compared to control mice (Fig. 3).

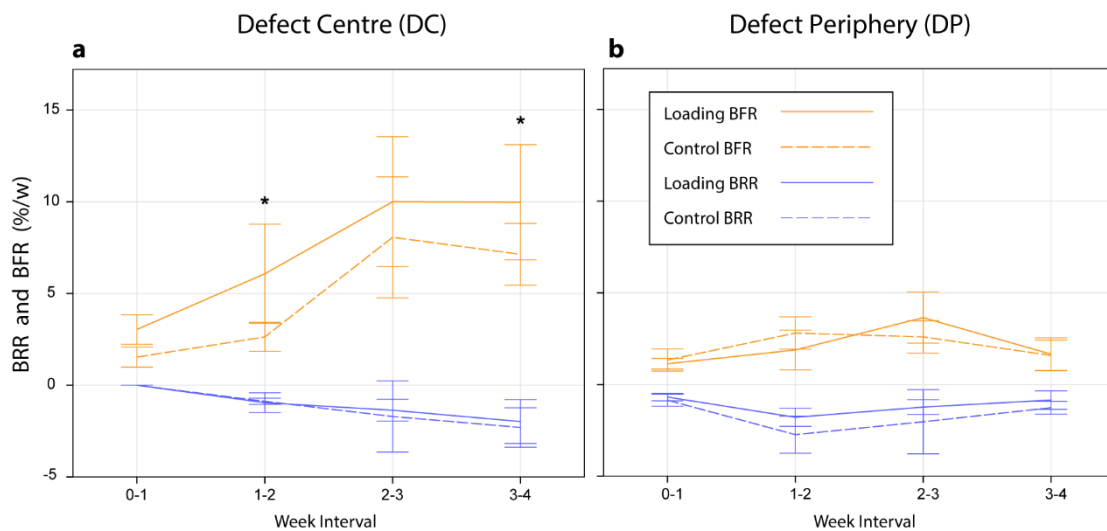

166



167 **Figure 3. Longitudinal changes in formation and resorption volume fractions. (a)** Loading  
168 influenced the BFR/DC compared to controls, and reached significance at postoperative weeks 2 and  
169 4, while loading did not appear to influence BRR/DC compared to controls. **(b)** Loading did not  
170 significantly influence either BFR/DP or BRR/DP compared to controls, at any time interval.

171

## 172 Mechanics of bone volume changes

173 After 4 weeks, none of the vertebrae had recovered their pre-surgery axial stiffness based on the  
174 applied forces. From week 2 onwards, the treatment had a significant positive effect on FE-calculated  
175 stiffness ( $p < 0.05$ , Supplementary Fig. S2a). There was also a significant positive Pearson's correlation  
176 between BV/TV in the DC, and FE-calculated normalized stiffness ( $r = 0.907$ ,  $n = 51$ ,  $p < 0.005$ ,  
177 Supplementary Fig. S2b), while in the DP the correlation to normalized stiffness was significant, but  
178 lower ( $r = 0.809$ ,  $n = 51$ ,  $p < 0.005$ ). A pattern was noted in the probability of formation, quiescence, or  
179 resorption events within the combined DC and DP regions; they were largely related to effective strain  
180 (EFF). The effective strain as a percentile of the max effective strain ( $EFF/EFF_{MAX}$ ) was used to find  
181 the conditional probability of a (re)modelling event occurring due to strain. During the first week of  
182 healing, bone formed with a random conditional probability ( $cp(x) = 33.3\%$ ). However, in subsequent  
183 weeks, bone formed in the upper half of the strain field ( $cpF(x > 50\%) > 33.33\%$ ). The probability  
184 for resorption was the highest within the first 30% of occurred strain leading to a small strain window  
185 where bone was predominantly quiescent between 30% and 50% (Fig. 4a). This pattern also occurred  
186 in control animals (Fig. 4b) where physiological strains were simulated with FE analysis (Fig. 5).  
187 When comparing the loading and control cases, the curvature of the formation, resorption and  
188 quiescence profiles in the loading cases had steeper and more pronounced curve sections compared to  
189 the control cases. There was also a small shift towards lower  $EFF/EFF_{MAX}$  being formative with  
190 loading.

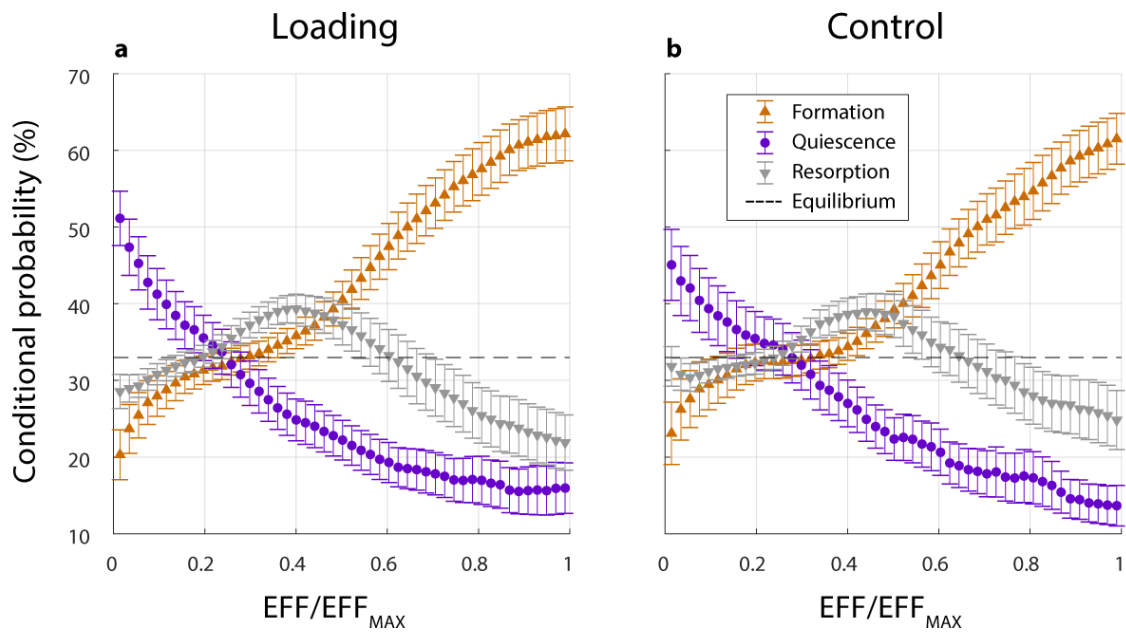

191

192 **Figure 4. Conditional probabilities of formation and resorption events within the combined DC**  
193 **and DP regions.** Effective strain as a ratio of the maximum effective strain value ( $EFF/EFF_{MAX}$ ). (a)  
194 Higher ratios of  $EFF/EFF_{MAX}$  led to formation activity in treatment groups, and lower ratios led to  
195 resorption activity, regardless whether externally loaded in the treatment group, or in (b) control  
196 animals with an assumed axial strain.

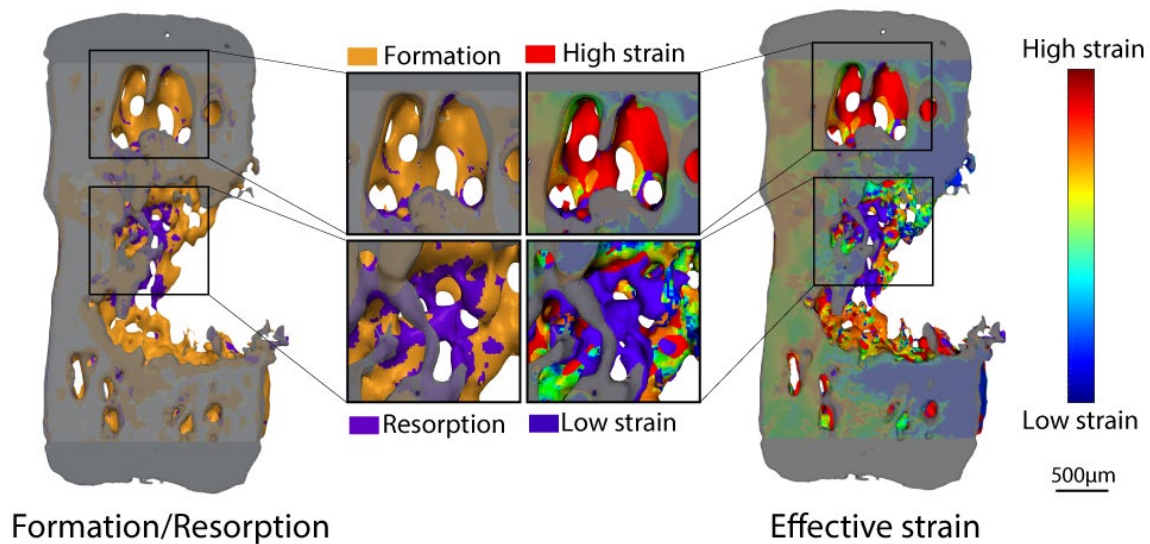

197

198 **Figure 5. Representative sample depicting formation and resorption relationship with effective**  
199 **strain.** Regions of higher effective strain tended to formation, while lower effective strain tended to  
200 resorption.

201

## 202 **Discussion**

203 While the influence of mechanical loading on bone (re)modelling is known, implementing this to  
204 defect healing creates other challenges. These arise as two aspects, being the changed mechanical  
205 environment due to the initial defect, and its unknown healing thereafter.

206

207 This study showed that by introducing an rtFE approach to an existing loading set-up<sup>22</sup>, bone defect  
208 healing could be significantly improved over no-treatment controls. Importantly, this approach  
209 succeeded in avoiding any incidence of fracture due to overloading, and in principle, homogenized  
210 strain across different defect shapes, sizes, and healing progressions. Adaption of the loading within  
211 the mechanical environment is not novel in itself, with mixed reports on the effectiveness of  
212 dynamization<sup>12,32</sup>, in which a change in stiffness of external fixators is adapted over healing periods.  
213 Adding to these existing concepts, this study estimated individualized loads to apply during healing;  
214 the rtFE approach allows much greater accuracy in the control of strain, as opposed to generic or pre-  
215 determined adaptive regimes.

216

217 Loading started at two days after the defect was created, at which time the mice were still relatively  
218 young at fourteen weeks old. The bone response to loading has previously been shown to have some  
219 age-dependency on mice around this age, where six week old mice had a more exaggerated response  
220 to loading compared to ten and sixteen week old mice<sup>33</sup>. Hence, it could be questioned whether the  
221 positive effect found in this study would also be repeated in older mouse. In this regard, it has been  
222 reported that after sixteen weeks old, aging has less of an influence on the response to loading<sup>30</sup>. At  
223 fourteen weeks old, the mice in this study are near the border of this apparent age threshold. As such,  
224 prior studies suggest the positive effect of this rtFE loading could be beneficial into adulthood and  
225 beyond, though further studies would be needed to confirm this.

226

227 The timing of loading after bone injury is a topic of debate. In general, loading is known to influence  
228 cell activity and function due to tissue deformation and fluid flow<sup>34</sup>. Furthermore, it influences both  
229 spatial and temporal biological responses at multiple scales<sup>35,36</sup>. This aspect is more important in the  
230 case of bone healing, where multiple overlapping phases exist. Early loading from two days onwards  
231 has been reported less effective than delayed loading at two weeks<sup>37</sup>. However, it has also been  
232 reported that early cyclic loading may increase oxygen transport to the defect region<sup>38</sup>, promoting the  
233 longer term regeneration response. As differences in bone parameters were already noted after two  
234 weeks in this study, it seems that early loading of three sessions per week is potentially more effective  
235 than delayed loading, especially as subject-specific adaptive loading will be in an efficient range  
236 without risking damage to early callus structures.

237

238 The new bone that formed within the defect did not appear to be simply recreating the pre-defect bone  
239 structure, but to be forming based on other factors. During the defect healing, strain appeared to guide  
240 bone (re)modelling activities, more so than an inherent sense of prior bone anatomy. Bone appeared to  
241 form in compensation for the asymmetry of the defected bone, without cortical bridging, but with  
242 densely arranged trabecular bone within the marrow cavity in a conical, V-like shape. This formation  
243 pattern supports the idea of a universal cellular mechanobiological response regardless of the location  
244 within the body, or the presence of fixation implants. This aligns with concepts of bone resorption  
245 being caused by either disuse or stress-shielding, where the cells respond to the loads they experience  
246 depending on their mechanical state, and not of the cause of the change. Further, the axial mechanical  
247 stiffness over the four weeks, as assessed with FE, did not recover to its pre-defect strength,  
248 suggesting that healing would continue into the future. The model was newly developed, and the level  
249 of impairment over longer time periods would require further characterization of the model. As this  
250 study duration was only four weeks, it is unclear whether (re)modelling would eventually result in a  
251 structure similar to the native vertebra over time, or even have healed completely given more time.  
252 Regardless, bone formation during early healing was related to and guided by bone strain (Fig. 5).  
253 This applied to both the loaded and the control group, which could be exposed to physiological strain

254 that may peak at  $4N^{14}$ . Strain-induced bone (re)modelling principles have been previously  
255 recognized<sup>15,16</sup>, in which loading favors formation over resorption<sup>17</sup>.

256

257 This principle is evident elsewhere, where in a study of mouse femoral fractures, fracture site  
258 remodeling after three weeks has shown to be consistent with previously considered remodeling  
259 theories<sup>39</sup>. However, such comparisons to other locations within the body can be confounded by non-  
260 biomechanical factors. For example, the difference in the presence of bone marrow and stem cells,  
261 cancellous and cortical bone ratios, and the large muscles surrounding the femur that supply blood and  
262 cytokines. While different locations in the body have different factors that can influence healing,  
263 similarities do exist between different bone defect models. This study developed and used a confined  
264 partial defect model. When comparing this healing to an externally-fixated mouse femoral full  
265 osteotomy defect model, mechanical loading from the fourth week onwards also significantly  
266 increased BV/TV in the defect centre region. One difference though was the patterns in the BFR and  
267 BRR once loading began<sup>19</sup>. Of relevance here is the phase of healing in which loading begins. In the  
268 femoral full osteotomy model, a four week loading delay was implemented to allow for bridging  
269 across the defect void. Thus, the inflammatory phase of healing has passed when loading begins. In  
270 comparison, the partial vertebral defect used in this study allows for loading within the first week after  
271 defect creation, during the early inflammatory phase of healing. When comparing healing in the  
272 controls in the weeks following defect creation, the BFR and BRR showed similarities in responses  
273 between both the osteotomy and partial defect models. It is clear that many confounding factors exist  
274 when making such comparisons, including the timing of loading, the healing phase which loading  
275 begins, the anatomical location and defect differences. Despite these differences, the bone healing  
276 responses to loading within the defect centre and periphery were comparable between these very  
277 different defect types. Overall, this further supports a universal relationship between bone healing and  
278 loading in mice. Future experiments could confirm this by extending the timeline of loading past four  
279 weeks in this vertebral model, by starting loading in later weeks, or by creating a full osteotomy  
280 variation of this partial defect vertebral model. Comparisons to intact vertebrae also support the  
281 relationship between healing and loading. The conditional probabilities of formation, quiescence and

282 resorption (Fig. 4) in this defect study correlate with prior studies of intact vertebra, where  
283 (re)modelling events have a relationship to the strain percentile, and that loading may slightly shift the  
284 strain percentile in which formation events occur<sup>15,25</sup>. Considering the above studies, this rtFE study  
285 also supports these mechanoregulation theories and further validates the principle in mouse vertebral  
286 bone defect healing as well.

287

288 Over 80% of the variance ( $r=0.907$ ,  $R^2=0.823$ ) in BV/TV could be accounted for by change in FE-  
289 calculated normalized stiffness, and this demonstrates the rtFE approach's ability to estimate the  
290 loading intensity that should be applied. This provided some validation of the rtFE methods used. The  
291 FE method, however, only accounted for purely axial compression, aligned to the principal component  
292 of the vertebra. In reality, the vertebra was able to vibrate in different modes as it would be  
293 constrained differently to the FE models. Therefore, it would have inevitably had some external  
294 bending and rotational components not factored in by the simplified FE analyses. Despite this, the  
295 relatively high correlation provides suitable confidence in the rtFE protocol. It kept the actual  
296 computational processing time to around two minutes, to avoid the well-known effects of animal  
297 anesthesia and its possibility to confound the results<sup>40</sup>. Additionally, this correlation is noteworthy  
298 considering a dynamic in vivo load was simplified to a static linear simulation. Such linear simulations  
299 have previously been reported to be appropriate<sup>41</sup> and capture this dynamic behavior via a static  
300 apparent modulus<sup>42</sup>. Meanwhile, future improvements to computational non-linear analyses may  
301 provide future insights<sup>43</sup>. Overall, while assumptions and simplifications exist, this approach was able  
302 to balance computational accuracy and cost, and provide confirmation of the usefulness of the rtFE  
303 method.

304

305 This study did not compare subject-specific adaptive loading group to any traditional, non-adaptive,  
306 non-subject-specific loading group. Mechanical loading is well-established to enhance bone healing,  
307 and this has been extensively demonstrated in a variety of animal models using various loading  
308 modalities. But many questions remain on how to implement this knowledge into practice, where

309 defects and their healing progression can vary widely. This study developed and implemented an  
310 objective 3-dimensional imaging and analysis method to assess a defect and its healing, and  
311 demonstrated how this could be linked to a known effective loading regime while reducing secondary  
312 fracture risks (Supplementary Fig. S1). This overall approach attempts to foresee technological  
313 progress and tools that could be more reliable than, for example, subjective grading scales of fractures  
314 based on 2-dimensional imaging with subsequent loading based on this assigned grading scale. In this  
315 regard, this study does not provide evidence that the complex, objective methodology presented in this  
316 study provides improved outcomes compared to a simpler subjective analysis and/or non-adaptive  
317 loading regime. Future studies could be designed to investigate if such a benefit truly exists between  
318 these approaches. In principle, though, a leaning towards objective, (semi-)quantitative analyses have  
319 historically prevailed over subjective, qualitative analyses, and this study attempts to follow this path.

320

321 As discussed, assumptions and simplifications created several limitations to this study which cover  
322 both animal and computational aspects. For the animal aspects, the mice were relatively young, the  
323 healing was not completed within the four weeks, and three mice were excluded which reduced study  
324 power. Defects were created using relatively basic tools, and while this provides simplicity and an  
325 ability to apply the model, it also introduces some variability in the defect volume across animals.  
326 However, this is factored for in the BV/TV calculation. The pinning of the adjacent vertebra also  
327 lacked certain control in position and angle, which creates unknowns in how the defect vertebra is  
328 loaded, and the modes it vibrates in considering the semi-constrained nature. Future studies could be  
329 extended past four weeks in older mice, improve the defect precision and repeatability, and increase  
330 pinning control. As for the computational aspects, one of the greatest limitations is the simplifications  
331 in the FE model. Firstly, the materials and models are linear elastic, which would not capture any non-  
332 linear behaviour of vibration or visco-elastic effects. Material properties of the modelled discs were  
333 that of bone, and all surrounding and void voxels not designated as bone were assigned a Young's  
334 modulus of 3MPa, including what would be muscle or air. As such, both the disc and non-bone  
335 regions are therefore stiffer than reality. Many of these computational limitations relate to the micro-  
336 FE solver, ParOSol<sup>44</sup>; however, these compromises enabled the efficient use of running the FE



337 remotely on a supercomputer, which created the possibility for near real-time results. While  
338 computational power is itself a limitation, future studies could explore methods to more accurately  
339 model such a dynamic system, and further validate the simplifications and assumptions used.

340

341 To translate this approach to patients, not only would further research and development be needed, but  
342 for technological advancements also to continue. Most obviously, the computational and hardware  
343 technology used in this study is not currently available to clinicians. Secondly, any patient-specific  
344 solutions within the FE-realm require computational assumptions to be made, which requires further  
345 expertise when applying case-by-case. These current limitations in translatability will likely be  
346 overcome as technology develops; this study demonstrates the possibilities the future research can  
347 strive towards, once technology and methods inevitably catch up for use in the larger-scales needed for  
348 humans.

349

350 In conclusion, individualized real-time adaptive loading can be achieved through a combination of  
351 micro-CT imaging, followed immediately by FE-solved strain distribution, and finally rescaling and  
352 application of a cyclic loading force accordingly. Further investigation is needed to compare this to  
353 traditional non-adaptive methods. This rtFE approach is highly relevant for clinical scenarios where  
354 bone fractures and their healing progression are unique. This approach optimizes loading intensity,  
355 and has the potential to reduce the risk of re-fracture or ineffective mechanical loading, thus improving  
356 the healing of bone defects.

357

## 358 **Materials and Methods**

### 359 **Study design and surgery**

360 Approval was obtained for the animal experiments from the cantonal ethics committee from the  
361 Kantonales Veterinäramt Zurich (Zurich, Switzerland, ZH029/18) prior to the study, and all  
362 experiments were performed in accordance with Swiss animal welfare act and ordinance, and



363 ARRIVE guidelines. The study included two groups: an rtFE loading group, that were adaptively  
364 loaded (3.2-5.5N, 10Hz, 5 minutes, 3000 cycles), and; a control group, that received sham loading  
365 (0N) and similar handling. Groups were allocated by block randomization within a larger study, with  
366 sample sizes estimated from previous similar research within the laboratory<sup>15</sup>, in which 2 groups for a  
367 repeated (4) measures ANOVA using G\*Power ( $\beta=0.8$ ,  $\alpha=0.05$ ,  $f=0.7$ , number measurements=4,  
368 correlation=0.8) estimated a total sample size of 16 (n=8 per group). All surgical, scanning and  
369 loading procedures were performed under isoflurane anesthesia (induction 5%, maintenance 1-2%, in  
370 O<sub>2</sub>). To be able to apply loading, three weeks prior to defect surgery, stainless steel pins (Fine Science  
371 Tools, Heidelberg, Germany) were inserted in the fifth and seventh caudal vertebrae under  
372 fluoroscopic control, as previously described (4). Perioperative analgesia (25 mg/L, Tramal,  
373 Gruenthal GmbH, Aachen, Germany) was delivered via the drinking water for pre-emptive pain  
374 relief two days prior to the defect surgery, and for three days post-surgery. All surgeries were  
375 performed by the same surgeon. For both groups, defects of approximately 0.8mm x 1.5mm were  
376 placed on the dorsal surface of the sixth caudal vertebrae of female fourteen-week old C57Bl/6JRj  
377 (Janvier Labs, Saint-Berthevin, France) mice using an electric rotary drill (Micro Drill, Harvard  
378 Apparatus, Holliston MA, United States) with 0.6mm and 0.8mm burs. This created an elongated void  
379 running along the dorsal aspect of the vertebrae (Supplementary Fig. S3). Humane endpoints included  
380 fracture, infection, bodyweight loss of > 15%, or inability to freely eat or drink.

381

## 382 Imaging and finite element methods

383 Vertebral defects were scanned at 10.5  $\mu\text{m}$  resolution on the day of surgery, and weekly thereafter,  
384 using an in vivo micro-CT (vivaCT 40, Scanco Medical AG, Brüttisellen, Switzerland, 55 kVp, 350  
385 ms integration time, and 145  $\mu\text{A}$ ). The resulting images were used as input for the rtFE procedure for  
386 animals in the loading group. Loading mice were kept under anesthesia during the image  
387 reconstruction and FE calculation.

388

389 The reconstructed images were Gaussian filtered (sigma 1.2, support 1) to reduce noise, and  
390 thresholded to assign material properties. Voxels within the threshold range from 395 mgHA/cm<sup>3</sup> to  
391 745 mgHA/cm<sup>3</sup> were regarded as bone. This bone was assigned isotropic linear elastic material  
392 properties with a Young's modulus between 4 GPa and 12.8 GPa, in threshold steps of 25 mgHA/cm<sup>3</sup>,  
393 in proportion with their density<sup>45</sup>. The Young's modulus of soft tissue was set to 3 MPa for values  
394 lower than 395 mgHA/cm<sup>3</sup>. The Poisson's ratio was set to 0.3. Vertebra geometry was aligned to the  
395 principal axis of the coordinate system in the z-direction. To achieve an even force distribution across  
396 the bone and to counter numerical issues with the solver, discs of 1.68 mm diameter with a Young's  
397 modulus of 12.8 GPa were added at the distal and proximal ends of the vertebrae, similar to previously  
398 used<sup>17</sup>. The outer surface of the distal disc was fixated using Dirichlet boundary conditions. The outer  
399 surface of the proximal disc was deformed by 1% by applying a pure compressive force in the normal  
400 (z) direction. Each model was solved using the ParOSol solver<sup>44</sup>, running at the Swiss National  
401 Supercomputing Centre (CSCS, Lugano, Switzerland) with 64 CPUs, taking less than 2 minutes in  
402 computing time. Effective strain was used as the output measurement for its ability to capture  
403 inhomogeneity in newly formed bone tissue. The dynamic character of the loading was not considered,  
404 in alignment with previous studies reporting that static simulations capture the main features and  
405 evolution of the mechanical environment<sup>41</sup>, while keeping computational complexity and time down.

406

407 To calculate the rescaled force suitable for the individual defect and healing progression, strain  
408 distributions were rescaled with a model intact vertebra with an 8N loading force used as the  
409 reference<sup>30</sup>. The 93rd percentile of strain resulting from the linear elastic FE model was used to rescale  
410 the loading force from 1% deformation to the intact reference strain level. It is accepted that the strain  
411 window most effective for bone modeling is between 800 and 2000 micro-strain<sup>21</sup>. Further, bone fails  
412 when 1 – 7% of the tissue units within the volume exceed 7000 micro strain<sup>46</sup>. To ensure that the  
413 strain distribution in the defect model satisfies both requirements, the 99th percentile of strain derived  
414 from five normal intact vertebrae of mice at similar age was used as a reference, and strain distribution  
415 in the defect vertebrae down-scaled by this factor (ratio=93<sup>rd</sup> Defect/99<sup>th</sup> Intact, Supplementary Fig.  
416 1b). This rescaled force was individual to each mouse and adjusted after imaging (Supplementary Fig.

417 S3), in what is termed real-time, as the bone is relatively unchanged during this period of scanning and  
418 computation.

419

## 420 Animal model and loading

421 The first loading was applied two days after defect surgery, and three times per week thereafter. The  
422 defect vertebra was loaded via the pins in adjacent vertebrae using an in-house cyclic loading device,  
423 at 10Hz and 3000 cycles (5 minutes), similarly to previously reported<sup>15</sup>. The rescaled force calculated  
424 from the rtFE pipeline was used until the following weekly scan was completed, to balance the  
425 radiation exposure from imaging and the accuracy of the rescaled force. The rescaled force  
426 corresponded to the peak-to-peak cyclic loading, with 0.5N being the base position of the lower peak  
427 to avoid any inadvertent negative loads. Control mice were handled in a similar manner, and placed in  
428 the loading device immediately after their scan for 5 minutes without any loading applied. The control  
429 mice did not undergo the wait time associated with the rtFE computation.

430

## 431 Analysis of bone defect healing

432 For evaluation, two regions of interest were defined from the baseline defect scan of each animal (Fig.  
433 1a). The defect centre (DC) included the bony surface surrounding the defect (1 layer of voxels) as  
434 well as the space inside the defect. Region of interest determination was automated using a Hough  
435 transformation feature extraction technique by overfitting a cylinder to the medullary cavity and  
436 subsequently excluding any volume considered as existing bone within the created DC region. The  
437 defect periphery (DP) covered the remaining bone volume up to the start of the growth plates, as well  
438 as a dilated offset of 10 voxels to capture bone formation outside of the baseline cortical bone (Fig.  
439 1a).

440

441 Bone volume fraction (BV/TV) was calculated in the DC ( $BV_{DC}/TV_{DC}$ ) and in the DP ( $BV_{DP}/TV_{DP}$ )  
442 and normalized to their initial total volumes per region and per animal to calculate percentages<sup>47</sup>.

443 Dynamic bone morphometric parameters were calculated in the DC and DP regions by registering  
444 binary micro-CT images acquired at consecutive weeks which were overlaid to compute regions of  
445 formation (F), quiescence (Q) and resorption (R) that could be analyzed morphometrically to yield  
446 bone formation rate (BFR) and bone resorption rate (BRR)<sup>16,17</sup> in the DC (BFR<sub>DC</sub> and BRR<sub>DC</sub>) and in  
447 the DP (BFR<sub>DP</sub> and BRR<sub>DP</sub>), which is normalized to the respective initial volume, to calculate  
448 percentages per week, as shown previously<sup>48</sup>.

449  
450 After registration, images were gauss-filtered ( $\sigma = 1.2$ , support 1) and thresholded to a binary image at  
451 395mgHA/cm<sup>3</sup> (corresponding to 4 GPa). Effective strain relevant to the (re)modelling events on the  
452 bone surface was estimated using FE analysis as per the rtFE solving pipeline. By combing surface  
453 (re)modelling events with corresponding surface effective strains, correlations and conditional  
454 probabilities could be investigated in the DC and DP, similarly to previously reported<sup>15</sup>.

455  
456 Linear mixed-effects modelling was used for the statistical analysis (SPSS 24.0.0.0). Fixed-effects  
457 were allocated to: the time; and treatment. Random-effects were allocated to: the animal, to account  
458 for the natural differences in healing between different mice; and the animals' specific defect volumes.  
459 Assumptions were tested by analyzing the residuals of the fitted model. Post-hoc tests with multiple  
460 pairwise comparisons were corrected with Bonferroni criteria. Data is reported as mean ( $\pm$ SD), unless  
461 otherwise stated. Reporting of statistics follows guidelines from the Publication Manual of the  
462 American Psychological Association (APA). A p-value of  $p < 0.05$  was considered statistically  
463 significant unless reported otherwise.

464

## 465 **Data availability**

466 All necessary data generated or analyzed during the present study are included in this published article  
467 and its Supplementary Information files (preprint available on bioRxiv 2020.09.13.295402; doi:

468 <https://doi.org/10.1101/2020.09.13.295402>). Additional information related to this paper may be  
469 requested from the authors.

470

## 471 **References**

- 472 1. Myeroff, C. & Archdeacon, M. Autogenous bone graft: Donor sites and techniques. *Journal of*  
473 *Bone and Joint Surgery - Series A* (2011) doi:10.2106/JBJS.J.01513.
- 474 2. Goodship, A. E. & Kenwright, J. The influence of induced micromovement upon the healing of  
475 experimental tibial fractures. *J. Bone Joint Surg. Br.* **67**, 650–5 (1985).
- 476 3. Schell, H. *et al.* The course of bone healing is influenced by the initial shear fixation stability.  
477 *J. Orthop. Res.* (2005) doi:10.1016/j.orthres.2005.03.005.
- 478 4. Epari, D. R., Kassi, J. P., Schell, H. & Duda, G. N. Timely fracture-healing requires  
479 optimization of axial fixation stability. *J. Bone Jt. Surg. - Ser. A* (2007)  
480 doi:10.2106/JBJS.F.00247.
- 481 5. Betts, D. C. & Müller, R. Mechanical regulation of bone regeneration: Theories, models, and  
482 experiments. *Frontiers in Endocrinology* (2014) doi:10.3389/fendo.2014.00211.
- 483 6. Meakin, L. B., Price, J. S. & Lanyon, L. E. The contribution of experimental in vivo models to  
484 understanding the mechanisms of adaptation to mechanical loading in bone. *Frontiers in*  
485 *Endocrinology* (2014) doi:10.3389/fendo.2014.00154.
- 486 7. Warden, S. J. & Turner, C. H. Mechanotransduction in the cortical bone is most efficient at  
487 loading frequencies of 5-10 Hz. *Bone* (2004) doi:10.1016/j.bone.2003.11.011.
- 488 8. Yang, H., Embry, R. E. & Main, R. P. Effects of loading duration and short rest insertion on  
489 cancellous and cortical bone adaptation in the mouse tibia. *PLoS One* (2017)  
490 doi:10.1371/journal.pone.0169519.
- 491 9. Salisbury Palomares, K. T. *et al.* Mechanical stimulation alters tissue differentiation and  
492 molecular expression during bone healing. *J. Orthop. Res.* (2009) doi:10.1002/jor.20863.
- 493 10. Thompson, Z., Miclau, T., Hu, D. & Helms, J. A. A model for intramembranous ossification  
494 during fracture healing. *J. Orthop. Res.* (2002) doi:10.1016/S0736-0266(02)00017-7.
- 495 11. Augat, P., Merk, J., Wolf, S. & Claes, L. Mechanical stimulation by external application of  
496 cyclic tensile strains does not effectively enhance bone healing. *J. Orthop. Trauma* (2001)  
497 doi:10.1097/00005131-200101000-00010.
- 498 12. Claes, L. *et al.* Early dynamization by reduced fixation stiffness does not improve fracture  
499 healing in a rat femoral osteotomy model. *J. Orthop. Res.* (2009) doi:10.1002/jor.20712.
- 500 13. Claes, L. *et al.* Late Dynamization by Reduced Fixation Stiffness Enhances Fracture Healing in  
501 a Rat Femoral Osteotomy Model. *J. Orthop. Trauma* (2011)  
502 doi:10.1097/BOT.0b013e3181e3d994.
- 503 14. Christen, P., Van Rietbergen, B., Lambers, F. M., Müller, R. & Ito, K. Bone morphology  
504 allows estimation of loading history in a murine model of bone adaptation. *Biomech. Model.*  
505 *Mechanobiol.* (2012) doi:10.1007/s10237-011-0327-x.
- 506 15. Schulte, F. A. *et al.* Local Mechanical Stimuli Regulate Bone Formation and Resorption in  
507 Mice at the Tissue Level. *PLoS One* (2013) doi:10.1371/journal.pone.0062172.
- 508 16. Schulte, F. A., Lambers, F. M., Kuhn, G. & Müller, R. In vivo micro-computed tomography  
509 allows direct three-dimensional quantification of both bone formation and bone resorption

- 510 parameters using time-lapsed imaging. *Bone* (2011) doi:10.1016/j.bone.2010.10.007.
- 511 17. Lambers, F. M., Schulte, F. A., Kuhn, G., Webster, D. J. & Müller, R. Mouse tail vertebrae  
512 adapt to cyclic mechanical loading by increasing bone formation rate and decreasing bone  
513 resorption rate as shown by time-lapsed in vivo imaging of dynamic bone morphometry. *Bone*  
514 (2011) doi:10.1016/j.bone.2011.08.035.
- 515 18. Christen, P. & Müller, R. In vivo Visualisation and Quantification of Bone Resorption and  
516 Bone Formation from Time-Lapse Imaging. *Current Osteoporosis Reports* (2017)  
517 doi:10.1007/s11914-017-0372-1.
- 518 19. Wehrle, E., Paul, G. R., né Betts, D. C. T., Kuhn, G. A. & Müller, R. Individualized cyclic  
519 mechanical loading improves callus properties during the remodelling phase of fracture healing  
520 in mice as assessed from time-lapsed in vivo imaging. *bioRxiv* 2020.09.15.297861 (2020)  
521 doi:10.1101/2020.09.15.297861.
- 522 20. Paul, G. R., Wehrle, E., Tourolle, D. C., Kuhn, G. A. & Müller, R. Reducing variance in a  
523 mouse defect healing model: Real-time Finite Element Analysis allows homogenization of  
524 tissue scale strains. *bioRxiv* 2020.09.02.274878 (2020) doi:10.1101/2020.09.02.274878.
- 525 21. Frost, H. M. A determinant of bone architecture. The minimum effective strain. *Clin. Orthop.*  
526 *Relat. Res.* (1983) doi:10.1097/00003086-198305000-00047.
- 527 22. Webster, D. J., Morley, P. L., van Lenthe, H. H. & Müller, R. A novel in vivo mouse model for  
528 mechanically stimulated bone adaptation - A combined experimental and computational  
529 validation study. *Comput. Methods Biomech. Biomed. Engin.* (2008)  
530 doi:10.1080/10255840802078014.
- 531 23. Webster, D. *et al.* Mechanical loading of mouse caudal vertebrae increases trabecular and  
532 cortical bone mass-dependence on dose and genotype. *Biomech. Model. Mechanobiol.* (2010)  
533 doi:10.1007/s10237-010-0210-1.
- 534 24. Webster, D., Wirth, A., Van Lenthe, G. H. & Müller, R. Experimental and finite element  
535 analysis of the mouse caudal vertebrae loading model: Prediction of cortical and trabecular  
536 bone adaptation. *Biomech. Model. Mechanobiol.* (2012) doi:10.1007/s10237-011-0305-3.
- 537 25. Scheuren, A. C. *et al.* Mechano-regulation of bone adaptation is controlled by the local in vivo  
538 environment and logarithmically dependent on loading frequency. *bioRxiv* 2020.05.15.097998  
539 (2020) doi:10.1101/2020.05.15.097998.
- 540 26. Harris, J. S., Bemenderfer, T. B., Wessel, A. R. & Kacena, M. A. A review of mouse critical  
541 size defect models in weight bearing bones. *Bone* (2013) doi:10.1016/j.bone.2013.02.002.
- 542 27. Speirs, A. D., Heller, M. O., Duda, G. N. & Taylor, W. R. Physiologically based boundary  
543 conditions in finite element modelling. *J. Biomech.* (2007)  
544 doi:10.1016/j.jbiomech.2006.10.038.
- 545 28. Wehrle, E. *et al.* Evaluation of longitudinal time-lapsed in vivo micro-CT for monitoring  
546 fracture healing in mouse femur defect models. *Sci. Rep.* (2019) doi:10.1038/s41598-019-  
547 53822-x.
- 548 29. Tourolle né Betts, D. C. *et al.* The association between mineralised tissue formation and the  
549 mechanical local in vivo environment: Time-lapsed quantification of a mouse defect healing  
550 model. *Sci. Rep.* **10**, 1–10 (2020).
- 551 30. Lambers, F. M. *et al.* Bone adaptation to cyclic loading in murine caudal vertebrae is  
552 maintained with age and directly correlated to the local micromechanical environment. *J.*  
553 *Biomech.* (2015) doi:10.1016/j.jbiomech.2014.11.020.
- 554 31. Christen, P. *et al.* Bone remodelling in humans is load-driven but not lazy. *Nat. Commun.*  
555 (2014) doi:10.1038/ncomms5855.



- 556 32. Glatt, V., Bartnikowski, N., Quirk, N., Schuetz, M. & Evans, C. Reverse dynamization  
557 influence of fixator stiffness on the mode and efficiency of large-bone-defect healing at  
558 different doses of rhBMP-2. *J. Bone Jt. Surg. - Am. Vol.* (2016) doi:10.2106/JBJS.15.01027.
- 559 33. Main, R. P., Lynch, M. E. & Van Der Meulen, M. C. H. Load-induced changes in bone  
560 stiffness and cancellous and cortical bone mass following tibial compression diminish with age  
561 in female mice. *J. Exp. Biol.* (2014) doi:10.1242/jeb.085522.
- 562 34. Vetsch, J. R., Betts, D. C., Müller, R. & Hofmann, S. Flow velocity-driven differentiation of  
563 human mesenchymal stromal cells in silk fibroin scaffolds: A combined experimental and  
564 computational approach. *PLoS One* (2017) doi:10.1371/journal.pone.0180781.
- 565 35. Glatt, V., Evans, C. H. & Tetsworth, K. A concert between biology and biomechanics: The  
566 influence of the mechanical environment on bone healing. *Frontiers in Physiology* (2017)  
567 doi:10.3389/fphys.2016.00678.
- 568 36. Paul, G. R., Malhotra, A. & Müller, R. Mechanical Stimuli in the Local In Vivo Environment  
569 in Bone: Computational Approaches Linking Organ-Scale Loads to Cellular Signals. *Current*  
570 *Osteoporosis Reports* (2018) doi:10.1007/s11914-018-0448-6.
- 571 37. Hausherr, T. C. *et al.* Effect of temporal onsets of mechanical loading on bone formation inside  
572 a tissue engineering scaffold combined with cell therapy. *Bone Reports* (2018)  
573 doi:10.1016/j.bonr.2018.04.008.
- 574 38. Witt, F., Duda, G. N., Bergmann, C. & Petersen, A. Cyclic mechanical loading enables solute  
575 transport and oxygen supply in bone healing: An in vitro investigation. *Tissue Eng. - Part A*  
576 (2014) doi:10.1089/ten.tea.2012.0678.
- 577 39. Isaksson, H. *et al.* Remodeling of fracture callus in mice is consistent with mechanical loading  
578 and bone remodeling theory. *J. Orthop. Res.* (2009) doi:10.1002/jor.20725.
- 579 40. Balcombe, J. P., Barnard, N. D. & Sandusky, C. Laboratory routines cause animal stress.  
580 *Contemp. Top. Lab. Anim. Sci.* (2004).
- 581 41. Huiskes, R., Rulmerman, R., Van Lenthe, G. H. & Janssen, J. D. Effects of mechanical forces  
582 on maintenance and adaptation of form in trabecular bone. *Nature* (2000)  
583 doi:10.1038/35015116.
- 584 42. Sarver, J. J. & Elliott, D. M. Mechanical differences between lumbar and tail discs in the  
585 mouse. *J. Orthop. Res.* (2005) doi:10.1016/j.orthres.2004.04.010.
- 586 43. Sas, A., Ohs, N., Tanck, E. & van Lenthe, G. H. Nonlinear voxel-based finite element model  
587 for strength assessment of healthy and metastatic proximal femurs. *Bone Reports* (2020)  
588 doi:10.1016/j.bonr.2020.100263.
- 589 44. Flaig, C. A highly scalable memory efficient multigrid solver for  $\mu$ -finite element analyses.  
590 (2012). doi:10.3929/ethz-a-007613965.
- 591 45. Mulder, L., Koolstra, J. H., den Toonder, J. M. J. & van Eijden, T. M. G. J. Intratrabecular  
592 distribution of tissue stiffness and mineralization in developing trabecular bone. *Bone* **41**, 256–  
593 265 (2007).
- 594 46. Pistoia, W. *et al.* Estimation of distal radius failure load with micro-finite element analysis  
595 models based on three-dimensional peripheral quantitative computed tomography images. *Bone*  
596 (2002) doi:10.1016/S8756-3282(02)00736-6.
- 597 47. Bouxsein, M. L. *et al.* Guidelines for assessment of bone microstructure in rodents using  
598 micro-computed tomography. *J. Bone Miner. Res.* **25**, 1468–1486 (2010).
- 599 48. Tourolle né Betts, D. C. *et al.* The association between mineralised tissue formation and the  
600 mechanical local in vivo environment: Time-lapsed quantification of a mouse defect healing  
601 model. *Sci. Rep.* (2020) doi:10.1038/s41598-020-57461-5.

602

603 **Acknowledgements**

604 The authors thank Nicholas Ohs, Duncan C. Tourolle for computational assistance, Ariane C.  
605 Scheuren and Charlotte Roth for animal assistance, and the Swiss National Supercomputing Centre  
606 (CSCS) for computational time. The authors thank Dr. Dr. Esther Wehrle for serving as deputy animal  
607 study director for this project providing advice on study design, surgery training, and veterinary  
608 support during the animal experiments. AM is also grateful for the funding from the William Harvey  
609 International Translational Research Academy (WHRI-Academy, PCOFUND-GA-2013-608765), and  
610 the European Commission under the Marie Curie Co-funding of Regional, National and International  
611 Programmes (COFUND). The research leading to these results has received funding from the People's  
612 Program (Marie Curie Actions) of the European Union's Seventh Framework Programme (FP7/2007-  
613 2013) under REA grant agreement number 608765 This project also has received funding from the  
614 European Research Council (ERC) under the FP7/2007-2013, entitled Advanced MechAGE, ERC-  
615 2016-ADG-741883.

616

617



618 **Author Information**

619 **Affiliation**

620 Institute for Biomechanics, ETH Zurich, Zurich, Switzerland.

621 Angad Malhotra, Matthias Walle, Graeme R. Paul, Gisela A. Kuhn, Ralph Müller.

622

623 **Contributions**

624 The study was designed by AM, GAK, and RM. The computational rtFE aspects were developed by  
625 AM, MW, and GRP, and performed remotely by MW. The animal experimental aspects were  
626 developed and performed by AM and GAK. Statistical and data analyses were performed by AM and  
627 MW. The manuscript was prepared by AM, and all authors reviewed and approved the final  
628 manuscript.

629

630 **Additional Information**

631 **Competing interests statement**

632 The authors declare no competing interests.

633

634 **Figure Legends**

635 **Figure 1. Time lapsed imaging and overlay of formation and resorption on a weekly basis. (a)**  
636 Time lapsed images of representative animals from both groups. **(b)** Weekly overlays show formation  
637 and resorption patterns from 1 to 4 weeks post-surgery. Bone formed within the defect without cortical  
638 bridging. Red/yellow: bone volume formed at week 1, 2, 3, and 4. Blue/purple: bone volume resorbed  
639 at week 1, 2, 3, and 4.

640 **Figure 2. Longitudinal changes in bone volume fraction. (a)** The vertebrae were divided into a  
641 defect centre (DC) and defect periphery (DP). **(b)** BV/TV within the DC significantly increased with  
642 the rtFE loading from week 2 compared to controls. **(c)** BV/TV within DP was also found to be  
643 influenced, but not to the same magnitude or extent as the DC.

644 **Figure 3. Longitudinal changes in formation and resorption volume fractions. (a)** Loading  
645 influenced the BFR/DC compared to controls, and reached significance at postoperative weeks 2 and  
646 4, while loading did not appear to influence BRR/DC compared to controls. **(b)** Loading did not  
647 significantly influence either BFR/DP or BRR/DP compared to controls, at any time interval.

648 **Figure 4. Conditional probabilities of formation and resorption events within the combined DC**  
649 **and DP regions.** Effective strain as a ratio of the maximum effective strain value ( $EFF/EFF_{MAX}$ ). **(a)**  
650 Higher ratios of  $EFF/EFF_{MAX}$  led to formation activity in treatment groups, and lower ratios led to  
651 resorption activity, regardless whether externally loaded in the treatment group, or in **(b)** control  
652 animals with an assumed axial strain.

653 **Figure 5. Representative sample depicting formation and resorption relationship with effective**  
654 **strain.** Regions of higher effective strain tended to formation, while lower effective strain tended to  
655 resorption.
